# Supplementary material
Source: Springer Nature journal article supplement (https://www.springermedizin.de/resource/supplementary/13047_2008_76_MOESM4_ESM.pdf/9663130)

**A**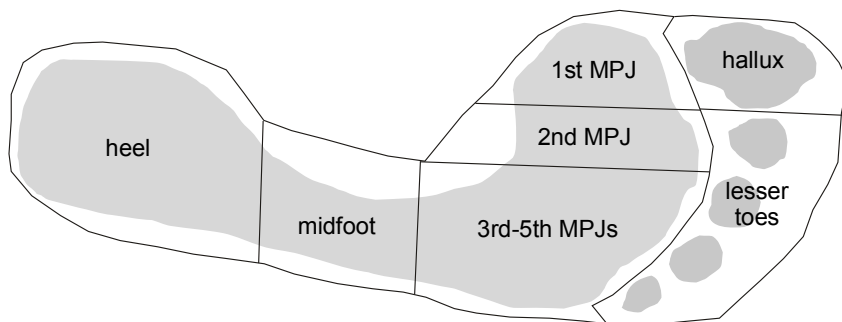**B**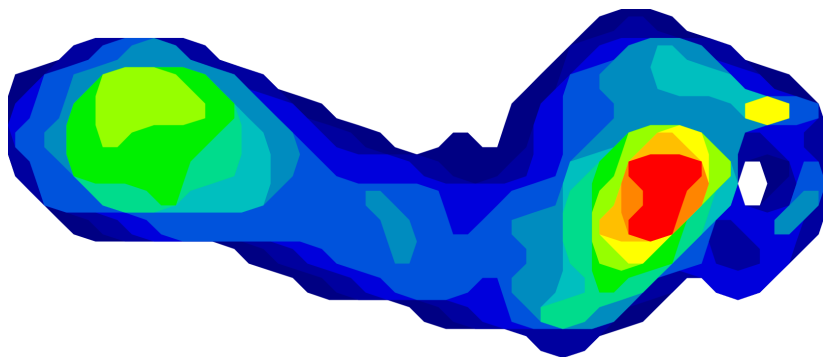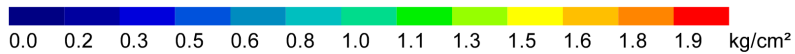

Supplement: MOESM4 [file 9663130]
